# Supplementary material for: Synthesis of dendrimers with multifunctional periphery using an ABB′ monomerElectronic supplementary information (ESI) available: experimental details. See http://www.rsc.org/suppdata/cc/b2/b212206p/
Source: Royal Society of Chemistry journal article supplement (doi:10.1039/b212206p), 2003-02-21
Supplement: b212206p.doc [file b212206p.doc]

# Supporting information for

# “Synthesis of dendrimers with multifunctional periphery using an ABB’ monomer”

# Dharma Rao Vutukuri, Kulandaivelu Sivanandan and S. Thayumanavan*

# Department of Chemistry, Tulane University, New Orleans, LA 70118, U.S.A.

# Fax: +1-504-865-5596; E-mail: thai@tulane.edu

E**xperimental Details**

# 1H-NMR spectra were recorded on a 400 MHz NMR spectrometer using the residual proton resonance of the solvent as internal standard. Chemical shifts are reported in parts per million (ppm). When peak multiplicities are given, the following abbreviations are used: s, singlet; d, doublet; t, triplet; q, quartet; qt, quintet; m, multiplet; b, broad. 13C-NMR spectra were proton decoupled and recorded on a 100 MHz NMR spectrometer using the carbon signal of the deuterated solvent as the internal standard. MALDI-TOF mass spectra were obtained at the Coordinated Instrumentation Facility of Tulane University. MALDI-TOF MS data was collected using 2,5-dihydroxybenzoic acid (DHB) as matrix. When the MW peak in the MALDI-ToF spectrum is broad, the values reported are based on the peak of the broad signal. Mass spectra were also obtained using an EI mass spectrometer integrated with a HP gas chromatograph either by direct injection or through a GC coulmn. Flash chromatography was performed with EM science 37-75 m silica gel. Analytical thin layer chromatography was performed on EM science silica plates with F-254 indicator and the visualization was accomplished by UV lamp or using the molybdic acid stain mixture. THF was distilled over Na/Ph2CO ketyl. All other chemicals obtained from commercial sources were used without further purification, unless otherwise mentioned. Compound 11 was synthesized using previously reported procedure (Reference 7a in the main text of the paper).

**General Procedure for the Synthesis of 3-mer Ester Using the Monomer 1 and the two Benzyl bromides:** A mixture of phenolic compound (1.0 equiv), appropriate bromomethyl compound (1.0 equiv), dry K2CO3 (2.0 equiv), 18-crown-6 (0.1 equiv) and THF was heated to reflux and stirred vigorously under nitrogen atmosphere for 12h. After the alkylation of the phenol, the second bromomethyl compound (1.2 equiv) was added followed by NaH (2.0 equiv). The reaction mixture was stirred at room temperature for 1h. The reaction was quenched with dil. HCl and the residue was partitioned between water and CH2Cl2. The organic layer was separated and the aqueous layer was extracted with CH2Cl2. The combined organic layers were dried over Na2SO4 and evaporated to dryness. The crude product was purified by silica gel column chromatography.

**General Procedure for Conversion of Esters to Corresponding Alcohols:** To the ester (1.0 equiv) in THF was added 2.0 M solution of BH3:DMS complex (5.0 equiv) and the mixture was refluxed 12h. After completion of the reaction, the reaction mixture was quenched with saturated NH4Cl solution and the compound was extracted using diethyl ether. The organic layer was dried over Na2SO4 and evaporated to dryness. The crude product was purified by silica gel column chromatography.

**General Procedure for Conversion of Benzylic Alcohols into the Corresponding Benzyl Bromides:** To a stirred solution of the appropriate benzyl alcohol (1.0 equiv) and PPh3 (1.1-1.3 equiv) in minimal dry THF, was added *N*-Bromosuccinimide (1.1-1.3 equiv) under nitrogen atmosphere. The reaction mixture was stirred at room temperature and was monitored by TLC (all reactions completed within 1-5 min). The reaction mixture was treated with water and extracted two times with CH2Cl2. The combined organic layer was dried over Na2SO4 and evaporated to dryness. The crude product was purified by silica gel column chromatography.

General Procedure for reaction of Benzylic alcohol with Benzyl bromide: To a stirred solution of NaH (2.0 equiv) in dry THF was added appropriate benzyl alcohol in THF under nitrogen atmosphere. The reaction mixture was stirred at room temperature for 15 min. A mixture of 18-crown-6 and appropriate bromomethyl compound in dry THF was added dropwise to the above solution. The reaction was monitored by TLC. After completion of the reaction, it was quenched with water and extracted with ether. The organic layer was washed with brine and dried over Na2SO4. The organic layer was evaporated and purified by silica gel column chromatography.

Ethyl 3-Hydroxy-5-hydroxymethylbenzoate (1):

3-Hydroxydiethylpthalate (25.0 g, 86.0 mmol) was dissolved in dry diethylether (150 mL) and added to solution of LiAlH4  (9.88 g, 104 mmol) in diethylether (350 mL) dropwise at 0OC under nitrogen atmosphere. The reaction was allowed to stir for 1h. The reaction was quenched with saturated aqueous NH4Cl solution and the compound was extracted using ethyl acetate. The organic layer was dried over Na2SO4 and evaporated to dryness. The crude product was purified by silicagel column chromatography using ethyl acetate/hexane (25:75) as eluent. Yield 5.20 g (30%). 1H NMR (400 MHz, CDCl3):  7.55 (bs, 1H), 7.43 (bs, 1H), 7.09 (bs, 1H), 6.3 (bs, 1H), 4.68 (s, 2H), 4.36 (q, *J* = 6.8 Hz, 2H), 2.41 (bs, 1H), 1.38 (t, *J =* 6.8 Hz, 3H); 13C NMR (100 MHz, CDCl3):  166.2, 157.7, 144.9, 132.0, 118.8, 118.2, 114.6, 63.5, 60.8, 14.0; GC/MS Calcd: (M)­­+ (C10H12O4) *m/z* = 196.1. Found: *m/z* (r.i.): 196.0(M+, 91), 167(20), 167(20), 151(100), 123(31), 121(22), 104(16), 94(35), 77(19), 67(12), 65(15).

The 3-mer-ester (3a):

**1** (1.00 g, 5.09 mmol), 3-bromobenzyl bromide (1.27 g, 5.09 mmol), K2CO3 (1.50 g, 10.1 mmol), 18-crown-6 (0.13 g, 0.50 mmol) and THF (20 mL) were used. The reaction was refluxed for 8h. After completion of the reaction, a small aliquot of the reaction mixture was taken for TLC purpose. Sodium hydride (0.40 g, 10.1 mmol) and 3-methylbenzyl bromide (0.82 mL, 6.11 mmol) was added and strirred for 2h at room temperature. The product was purified by silica gel chromatography using ethyl acetate/hexane (5:95) as eluent. Yield 1.98 g (82%). 1H NMR (400 MHz, CDCl3):  7.68-7.08 (m, 11H), 5.05 (s, 2H), 4.55 (s, 2H), 4.52 (s, 2H), 4.36 (q, *J=* 6.8Hz, 2H), 2.35(s, 3H), 1.39 (t, *J=* 6.8 Hz, 3H); ­­­­13C NMR (100 MHz, CDCl3):  166.1, 158.5, 140.3, 138.7, 138.0, 137.7, 131.8, 131.0, 130.3, 130.1,128.5, 128.4, 128.3, 125.8, 124.8, 122.6, 121.5, 118.8, 114.3, 72.3, 71.3, 69.1, 61.1, 21.3, 14.2. MALDI-TOF MS: Calcd: (M+Na)+ (C25H25BrNaO4) *m/z* = 491.08. Found: (M+Na)+ *m/z* = 494.01.

The 3-mer-ester (3b):

**1** (0.80 g, 4.07 mmmol), 4-bromobenzyl bromide (1.00 g, 4.07 mmol), K2CO3 (1.12 g, 8.10 mmol), 18-crown-6 (0.10 g, 0.40 mmol) and THF (20 mL) were refluxed until completion of the reaction. Sodium hydride (0.32 g, 8.15 mmol) and 2-methylbenzyl bromide (0.90 g, 4.89 mmol) were used. The product was purified by silica gel chromatography using ethyl acetate/hexane (5:95) as eluent. Yield 1.78 g (93%). 1H NMR (400 MHz, CDCl3):  7.64 (bs, 1H), 7.55 (bs, 1H), 7.48-7.12 (m, 9H), 4.99 (s, 2H), 4.54 (s, 2H), 4.52 (s, 2H), 4.34 (q, *J =* 6.8 Hz, 2H), 2.3 (s, 3H), 1.37 (t, *J=* 6.8 Hz, 3H); ­­­­13C NMR (100 MHz, CDCl3):  166.0, 158.4, 140.2, 136.5, 135.5, 135.4, 131.6, 131.5, 130.1, 128.9, 128.5, 127.9, 125.6, 121.7, 121.2, 118.5, 114.2, 71.3, 70.6, 69.1, 60.9, 18.6, 14.1. MALDI-TOF MS: Calcd: (M+Na)+ (C25H25BrNaO4) *m/z* = 491.08. Found: (M+Na)+ *m/z* =494.69.

The 3-mer-OH (4a):

**3a** (1.12 g, 2.39 mmol), 2.0M BH3:DMS (5.90 mL, 11.9 mmol) and THF (20 mL) were used. The product was purified by silica gel column chromatography using ethyl acetate/hexane (25:75) as eluent. Yield 0.97 g (96%). 1H NMR (400 MHz, CDCl3):  7.59 (bs, 1H), 7.46-7.08 (m, 7H), 6.95 (bs, 1H), 6.91 (bs, 2H), 5.02 (s, 2H), 4.65 (s, 2H), 4.51 (s, 4H), 2.34 (s, 3H); ­­­­13C NMR (100 MHz, CDCl3):  158.8, 142.7, 140.2, 139.1, 138.0, 137.8, 130.9, 130.2, 130.0, 128.5, 128.4, 128.2, 125.7, 124.8, 122.6, 118.7, 113.0, 112.3, 72.3, 71.7, 68.9, 64.9, 21.3. MALDI-TOF MS: Calcd: (M+Na)+ (C25H25BrNaO3) *m/z* = 449.07. Found: (M+Na)+ *m/z* = 450.51.

3-mer-OH (4b):

**3b** (0.58 g, 1.23 mmol), 2.0 M BH3:DMS solution (3.09 mL, 6.19 mmol) and THF (15 mL) were used. The product was isolated by silica gel column chromatography using ethyl acetate/hexane (25:75) as eluent. Yield 0.49 g (92%). 1H NMR (400 MHz, CDCl3):  7.49 (s, 1H), 7.47 (s, 1H), 7.38-7.14 (m, 6H), 6.93(bs, 1H), 6.89 (bs, 2H), 5.00 (s, 2H), 4.63 (s, 2H), 4.53 (s, 2H), 4.51 (s, 2H), 2.31 (s, 3H); ­­­­13C NMR (100 MHz, CDCl3):  158.8, 142.6, 140.1, 136.6, 135.6, 135.4, 131.5, 130.1, 128.9, 128.5, 127.8, 125.7, 121.7, 118.6, 112.9, 112.3, 71.9, 70.6, 69.06, 64.8, 18.7. MALDI-TOF MS: Calcd: (M)+ (C25H25BrNaO3) *m/z* = 426.08. Found: (M)+ *m/z* = 429.28.

3-mer-Br (5a):

**4a** (0.91 g, 2.13 mmol), NBS (0.42 g, 2.56 mmol), PPh3 (0.62 g, 2.56 mmol) and THF (15 mL) were used. The product was isolated by silica gel column chromatography using ethyl acetate/hexane (3:97) as eluent. Yield 0.83 g (79%). 1H NMR (400 MHz, CDCl3):  7.60 (bs, 1H), 7.50-7.10 (m, 7H), 7.00 (bs, 1H), 6.93 (s, 2H), 5.03 (s, 2H), 4.52 (s, 2H), 4.51 (s, 2H), 4.46 (s, 2H), 2.37 (s, 3H); ­­­­13C NMR (100 MHz, CDCl3):  158.6, 140.5, 139.1, 138.8, 137.8, 137.7, 130.8, 130.1, 129.9, 128.4, 128.3, 128.2, 125.7, 124.7, 122.5, 120.7, 114.4, 113.7, 72.2, 71.3, 68.8, 33.1, 21.3. MALDI-TOF MS: Calcd: (M)+ (C25H22Br2O2) *m/z* = 488.0. Found: (M)+ *m/z* = 489.85.

3-mer-Br (5b):

**4b** (0.50 g, 1.17 mmol), NBS (0.25 g, 1.40 mmol), PPh3 (0.36 g, 1.40 mmol) and THF (15 mL) were used. The product was isolated by silica gel column chromatography using ethyl acetate/hexane (3:97) as eluent. Yield 0.72 g (86%). 1H NMR (400 MHz, CDCl3):  7.52-7.46 (m, 2H), 7.34-7.14 (m, 6H), 6.97 (bs, 1H), 6.90 (bs, 2H), 4.98 (s, 2H), 4.53 (s, 2H), 4.50 (s, 2H), 4.43 (s, 2H), 2.32 (s, 3H); ­­­­13C NMR (100 MHz, CDCl3):  158.6, 140.5, 139.0, 136.5, 135.7, 135.5, 131.5, 130.1, 128.9, 128.5, 127.7, 125.6, 121.7, 120.7, 114.4, 113.7, 71.5, 70.6, 69.0, 33.2, 18.7. MALDI-TOF MS: Calcd: (M+Na)+ (C23H22Br2NaO2) *m/z* =510.99. Found: (M+Na)+ *m/z* = 511.89.

**4-mer (6):**

**1** (0.53 g, 2.72 mmol), **5a** (1.59 g, 3.20 mmol), K2CO3 (0.74 g, 5.44 mmol), 18-crown-6 (0.07 g, 0.27 mmol) and THF (20 mL) were used. The product was isolated by silica gel column chromatography using ethyl acetate/hexane (25:75). Yield 1.35 g (82%). 1H NMR (400 MHz, CDCl3):  7.61-6.95 (m, 14H), 5.05 (s, 2H), 5.02 (s, 2H), 4.67 (s, 2H), 4.53 (s, 2H), 4.51 (s, 2H), 4.35 (q, *J =* 6.8 Hz, 2H), 2.35 (s, 3H), 1.37 (t, *J =* 6.8 Hz, 3H); ­­­­13C NMR (100 MHz, CDCl3):  166.2, 158.8, 158.7, 142.8, 140.4, 139.0, 138.2, 138.0, 137.8, 131.8, 130.9, 130.2, 130.0, 128.5, 128.4, 128.2, 125.8, 124.8, 122.6, 120.3, 119.3, 117.9, 114.3, 113.4, 112.9, 72.3, 71.6, 69.8, 69.0, 64.5, 61.1, 21.3, 14.2. MALDI-TOF MS: Calcd: (M+Na)+ (C33H33BrNaO6) *m/z* =627.14. Found: (M+Na)+ *m/z* = 628.47.

**Sythesis of 7-mer (7):**

**6** (0.30 g, 0.49 mmol), **5b** (0.26 g, 0.54 mmol), NaH (0.07 g, 1.48 mmol), 18-crown-6 (0.14 g, 0.54 mmol) and THF (15 mL) were used. The reaction was completed within 1h. Crude product was purified by chromatography on silica gel using ethyl acetate/hexane (20:80) as eluent. Yield 0.37 g (77%). 1H NMR (400 MHz, CDCl3) : 7.6-6.9 (m, 25H), 5.0 (s, 2H), 4.93 (bs, 4H), 4.52-4.48 (m, 12H), 4.33 (q, *J =* 6.8 Hz, 2H), 2.31 (s, 3H), 2.27 (s, 3H), 1.34 (t, *J*=6.8 Hz, 3H); 13C NMR (100 MHz, CDCl3)  ; 166.2, 158.9, 158.87, 158.80, 140.5, 140.2, 140.1, 139.7, 139.1, 138.2, 138.0, 137.9, 136.7, 135.95, 135.92, 131.8, 131.6, 131.0, 130.3, 130.2, 130.1, 129.0, 128.6, 128.5, 128.4, 128.3, 127.8, 125.8, 125.7, 124.8, 122.6, 121.8, 121.4, 119.6, 119.3, 118.9, 114.4, 113.4, 113.23, 113.21, 113.0, 72.3, 72.1, 71.9, 71.7, 71.5, 70.6, 69.9. 69.1, 69.0, 61.1, 21.3, 18.8, 14.3; MALDI-TOF MS: Calcd: (M+Na)+ (C56H54Br2NaO8) *m/z* = 1035.21. Found: (M+Na)+ *m/z* = 1037.7.

**Sythesis of 7-mer alcohol (8):**

**7** (0.35 g, 0.35 mmol), 2.0 M solution of BH3:DMS complex (1.00 mL, 2.10 mmol) and THF (15 mL) were used. Crude product was purified by chromatography on silica gel using ethyl acetate/hexane (30:70) as eluent. Yield 0.28 g (82%). 1H NMR (400 MHz, CDCl3) : 7.5-6.8 (m, 25H), 4.98 (s, 2H), 4.95 (s, 2H), 4.94 (s, 2H), 4.55 (s, 2H), 4.50-4.48 (m, 12H), 2.32 (s, 3H), 2.28 (s, 3H); 13C NMR (100 MHz, CDCl3)  : 158.9, 158.7, 158.6, 142.7, 140.2, 140.0, 139.86, 139.82, 139.0, 138.5, 137.9, 137.8, 136.5, 135.8, 131.4, 130.8, 130.17, 130.13, 129.9, 128.9, 128.5, 128.4, 128.3, 128.2, 127.7, 125.7, 125.6, 124.7, 122.5, 121.6, 119.5, 119.1, 118.5, 113.2, 113.14, 113.10, 113.01, 112.8, 112.1, 72.2, 71.89, 71.87, 71.83, 71.6, 70.5, 69.5, 68.9, 68.8, 64.7, 21.3, 18.7; MALDI-TOF MS: Calcd: (M+Na)+ (C54H52Br2NaO7) *m/z* = 993.20. Found: (M+Na)+ *m/z* = 994.98.

**Synthesis of 7-mer bromide (9):**

**7** (0.24 g, 0.24 mmol), PPh3 (0.10 g, 0.40 mmol), NBS (0.07 g, 0.40 mmol) and THF (5 mL) were used. Crude product was purified by chromatography on silica gel using ethyl acetate/hexane (15:85) as eluent. Yield 0.22 g (88%). 1H NMR (400 MHz, CDCl3) : 7.5-6.9 (m, 25H), 4.99 (s, 2H), 4.97 (s, 2H), 4.96 (s, 2H), 4.51-4.47 (m, 12H), 4.40 (s, 2H), 2.33 (s, 3H), 2.29 (s, 3H); 13C NMR (100 MHz, CDCl3)  : 158.8, 158.76, 158.74, 140.37, 140.36, 140.1, 139.7, 139.1, 139.0, 138.3, 137.9, 137.8, 136.5, 135.87, 135.82, 131.5, 130.8, 130.18, 130.14, 130.0, 128.9, 128.5, 128.4, 128.3, 128.2, 127.7, 125.7, 125.6, 124.7, 122.5, 121.6, 120.6, 119.5, 119.1, 114.4, 113.9, 113.3, 113.1, 113.0, 112.8, 72.2, 71.9, 71.8, 71.6, 71.5, 70.5, 69.6, 69.00, 68.8, 33.3, 21.3, 18.7; MALDI-TOF MS: Calcd: (M)+ (C54H51Br3O6) *m/z* = 1032.12. Found: (M)+ *m/z* = 1033.97.

**Synthesis of 8-mer Ester (10):**

**9** (0.21 g, 0.20 mmol), **1** (0.04 g, 0.20 mmol), K2CO3 (0.13 g, 1.00 mmol), 18-crown-6 (0.03 g, 0.10 mmol) and acetone (10 mL) were used. Crude product was purified by chromatography on silica gel using ethyl acetate/hexane (35:65) as eluent. Yield 0.18 g (82%). 1H NMR (400 MHz, CDCl3) : 7.5-6.9 (m, 28H), 5.0-4.9 (m, 8H), 4.59 (s, 2H), 4.52-4.49 (m, 12H), 4.32 (q, *J =* 6.8 Hz, 2H), 2.32 (s, 3H), 2.28 (s, 3H), 1.35 (t, *J*=6.8 Hz, 3H); 13C NMR (100 MHz, CDCl3)  : 166.1, 159.0, 158.75, 158.71, 158.6, 142.9, 140.3, 140.1, 140.0, 139.7, 139.0, 138.4, 138.1, 137.9, 137.8, 136.5, 135.8, 131.7, 131.5, 130.8, 130.18, 130.12, 130.00, 128.9, 128.5, 128.4, 128.3, 128.2, 127.7, 125.7, 125.6, 124.8, 122.5, 121.6, 120.2, 119.5, 119.1, 119.0, 117.8, 114.1, 113.5, 113.2, 113.1, 113.0, 112.9, 112.8, 72.2, 71.89, 71.84, 71.81, 71.6, 70.5, 69.7, 69.6, 68.9, 68.8, 64.2, 61.0, 21.2, 18.7, 14.2; MALDI-TOF MS: Calcd: (M+Na)+ (C64H62Br2NaO10) *m/z* = 1171.3. Found: (M+Na)+ *m/z* = 1172.3.

**Synthesis of 15-mer (12):**

**10** (0.079 g, 0.083 mmol), **11** (0.090 g, 0.080 mmol), NaH (0.011 g, 0.240 mmol), 18-crown-6 (0.021 g, 0.080 mmol) and THF (10 mL) were used. The reaction mixture was stirred at room temperature for 2h and further refluxed for 30 min. Crude product was purified by chromatography on silica gel using ethyl acetate/hexane (20:80) as eluent. Yield 0.11 g (72%). 1H NMR (400 MHz, CDCl3) : 7.6-6.9 (m, 41H), 6.67-6.46 (m, 9H), 5.0-4.93 (m, 18H), 4.52-4.49 (m, 16H), 4.33 (q, *J =* 6.8 Hz , 2H), 3.89 (t, *J*=6.4 Hz, 2H), 2.337 (s, 3H), 2.331 (s, 3H), 2.29 (s, 3H), 1.76-1.69 (qt, 2H), 1.42-1.25 (m, 17H), 0.87 (t, *J*=6.8 Hz, 3H); 13C NMR (100 MHz, CDCl3) : 166.1, 160.4, 160.1, 160.0, 159.9, 159.8, 159.7, 159.0, 158.8, 158.77, 158.75, 140.38, 140.37, 140.2, 140.15, 140.11, 139.8, 139.2, 139.1, 139.0, 138.9, 138.4, 138.18, 138.15, 137.9, 137.8, 136.7, 136.6, 136.4, 135.9, 135.8, 131.8, 131.5, 130.9, 130.2, 130.1, 130.0, 128.9, 128.7, 128.5, 128.48, 128.40, 128.3, 128.2, 127.8, 127.7, 127.4, 125.79, 125.70, 124.8, 124.6, 122.5, 121.7, 121.3, 119.5, 119.2, 119.1, 118.8, 114.4, 113.5, 113.3, 113.1, 113.0. 112.99, 112.90, 109.6, 106.59, 106.50, 106.4, 106.1, 105.7, 101.39, 101.32, 101.0, 72.24, 72.21, 71.95, 71.89, 71.86, 71.67, 71.3, 70.6, 70.0, 69.9, 69.8, 69.7, 69.6, 69.0, 68.98, 68.93, 67.9, 61.0, 31.8, 29.4, 29.3, 29.2, 29.1, 25.9, 22.6, 21.3, 18.7, 14.2, 14.0; MALDI-TOF MS: Calcd: (M+Na)+ (C117H119Br3NaO16) *m/z* = 2039.59. Found: (M+Na)+ *m/z* = 2045.02.
